# Supplementary material for: Gravity-induced single-layer gradient structure of Ni@Ti3C2Tx/PVA for enhanced microwave absorption
Source: Royal Society of Chemistry journal article supplement (doi:10.1039/d2ta09826a), 2023-01-01
Supplement: d2ta09826a1.pdf [file d2ta09826a1.pdf]

## Supporting Information

### **Gravity-induced single-layer gradient structure of Ni@Ti<sub>3</sub>C<sub>2</sub>T<sub>x</sub>/PVA for enhanced microwave absorption**

*Yajun Zhang, Rongxiang Hu, Peigen Zhang, Long Pan, \* ZhengMing Sun\**

Y. Zhang, R. Hu, Prof. P. Zhang, Prof. L. Pan, Prof. Z.M. Sun  
Key Laboratory of Advanced Metallic Materials of Jiangsu Province  
School of Materials Science and Engineering, Southeast University  
Nanjing 211189 PR China  
E-mail: panlong@seu.edu.cn (L. Pan), zmsun@seu.edu.cn (Z.M. Sun)

Table S1. Viscosity of PVA solutions.

| Concentration | Viscosity at room temperature (cP) | Viscosity at 60 °C (cP) | Rotation speed used during test (rpm) |
|---------------|------------------------------------|-------------------------|---------------------------------------|
| 5wt.%         | 10                                 | 2.5                     | 100                                   |
| 15wt.%        | 1025                               | 407                     | 100                                   |
| 15wt.%        | 1050                               | 400                     | 10                                    |
| 25wt.%        | 25750                              | 13350                   | 10                                    |

Note: Different rotation speed is used due to the different viscosity of sample. The higher rotation speed represents lower measuring range and higher precision. For rotation speed of 100 rpm, the measuring range is 0 ~ 5000 cP, which is not enough for the viscosity of 25wt.% PVA. The difference between viscosity measured using different rotation speed is acceptable, which can be seen from the data of 15wt.% PVA.

Table S2. Effect of distribution of Ni@Ti<sub>3</sub>C<sub>2</sub>T<sub>x</sub> on microwave absorbing performance of the SLGS films.

| SLGS Film | Distribution of Ni@Ti <sub>3</sub> C <sub>2</sub> T <sub>x</sub> | RL <sub>min</sub> (dB) |
|-----------|------------------------------------------------------------------|------------------------|
| NTP-1     | Small gradient                                                   | -15.75                 |
| NTP-2     | Medium gradient                                                  | -57.7                  |
| NTP-3     | Large gradient                                                   | -3.85                  |

Table S3. Microwave absorbing performance of reported film materials.

| Absorber                                               | RL <sub>min</sub> (dB) | EAB (GHz) | Tested frequency range (GHz) | Thickness (mm) | Reference |
|--------------------------------------------------------|------------------------|-----------|------------------------------|----------------|-----------|
| Ti <sub>3</sub> C <sub>2</sub> T <sub>x</sub> /polymer | -26.1                  | 4.2       | 8.2-12.4                     | 7.3            | [1]       |
| V <sub>4</sub> C <sub>3</sub> T <sub>x</sub> /PU       | -39                    | 4.2       | 8.2-12.4                     | 3.4            | [2]       |
| SiC/MXene/polymer                                      | -45.5                  | 3.5       | 2-18                         | 1.58           | [3]       |
| CNF/MXene                                              | -42.2                  | 7.12      | 2-18                         | 4.7            | [4]       |
| MXene/Co/PVDF                                          | -38.2                  | 4.8       | 18-26.5                      | 3              | [5]       |
| CNTs/Fe <sub>3</sub> O <sub>4</sub> /PU/PET            | -17.19                 | 2         | 12-18                        | 1              | [6]       |
| RGO/epoxy                                              | -32                    | 10        | 8-18                         | 3.2            | [7]       |
| PVB/Co <sub>2</sub> Z/MXene                            | -46.3                  | 1.6       | 2-18                         | 2.8            | [8]       |
| PANI-PTSA/PU                                           | -37                    | 1.8       | 8.2-12.4                     | 1.2            | [9]       |
| GO/CNT-Fe <sub>3</sub> O <sub>4</sub>                  | -37.25                 | 1         | 2-18                         | 5              | [10]      |
| Ni@Ti <sub>3</sub> C <sub>2</sub> T <sub>x</sub> /PVA  | -57.7                  | 3.2       | 8.2-12.4                     | 2.22           | This work |

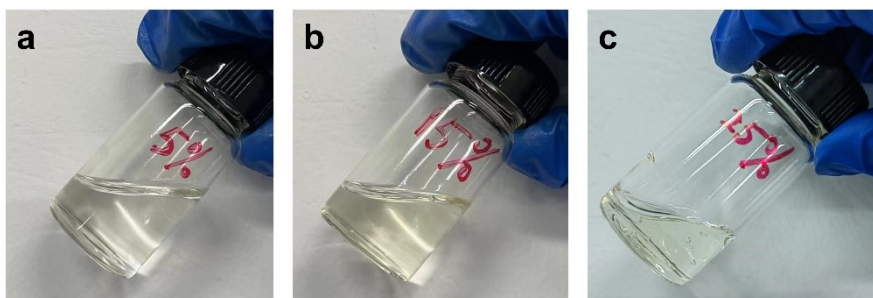

Figure S1. Photos of PVA solutions with concentration of **a** 5wt.%, **b** 15wt.%, **c** 25wt.%.

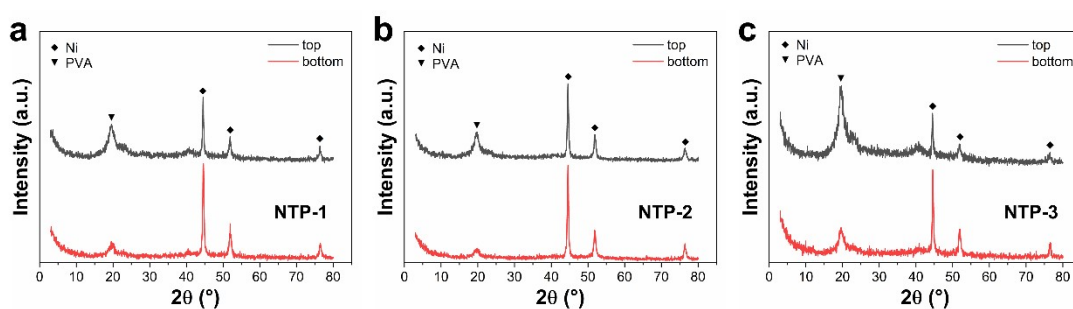

Figure S2. XRD patterns of top and bottom sides of **a** NTP-1, **b** NTP-2, **c** NTP-3.

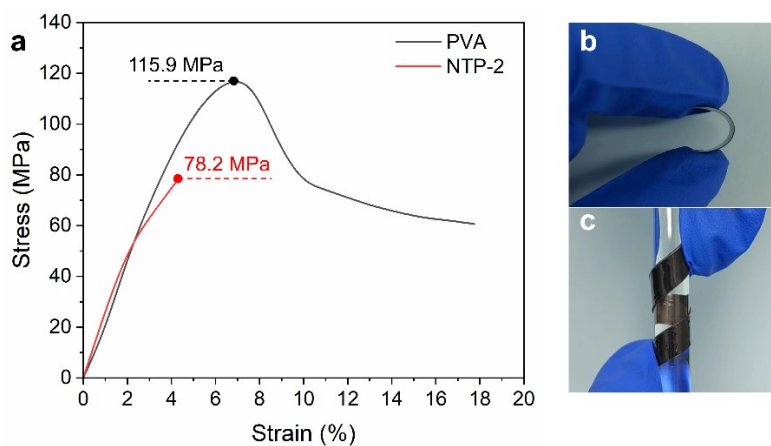

Figure S3. **a** Strain-Stress curves of pure PVA film and NTP-2. **b**, **c** Photos of NTP-2 showing its flexibility.

## Experimental

*Synthesis of  $Ti_3AlC_2$ :* TiC (2 ~ 4  $\mu\text{m}$ , Aladdin Reagent), Ti (300 mesh, Aladdin Reagent) and Al (300 mesh, Zhongnuo Advanced Material) with a mole ratio of 1.8:1:1 were mixed by a 3D powder mixer for 24 h. Afterwards, the mixture was put in an alumina crucible and heated to 1450  $^{\circ}\text{C}$  for 2 h in an argon atmosphere. The  $Ti_3AlC_2$  powder was obtained from crushing the derived bulk ceramic and sieving through a 300-mesh screen. SEM image and XRD pattern of the obtained  $Ti_3AlC_2$  is shown in **Figure S3**.

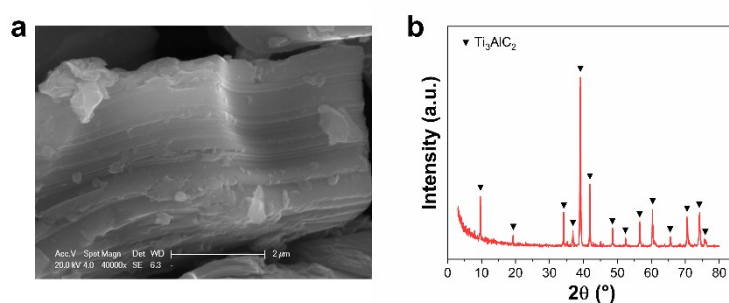

Figure S4. **a** SEM image and **b** XRD pattern of  $Ti_3AlC_2$ .

*Synthesis of few-layer  $Ti_3C_2T_x$  colloid:* First, 5 g of LiF (Aladdin Reagent) was added into 100 mL HCl (Sinopharm Chemical Reagent) and magnetic stirred at 500 rpm for 10 min to fully dissolve LiF. Then 5 g of  $Ti_3AlC_2$  was slowly added to the solution and kept stirring at 45  $^{\circ}\text{C}$  for 24 h. Afterwards, the product was repeatedly washed with deionized water by centrifugation at 4500 rpm for 5 min until the pH reached 6 ~ 7. The sediment was collected and added by 100 mL deionized water, followed by sonication in ice water bath and argon atmosphere for 60 min. The derived black liquid was centrifuged at 3500 rpm for 60 min and the supernatant is the few-layer  $Ti_3C_2T_x$  colloid. The concentration of the colloid was measured by freeze-drying method, and the measured concentration is about 15 mg/mL.

## Reference

- [1] B. Ji, S. Fan, S. Kou, X. Xia, J. Deng, L. Cheng, L. Zhang, *Carbon* **2021**, 181, 130.
- [2] M. Han, C. E. Shuck, A. Singh, Y. Yang, A. C. Foucher, A. Goad, B. McBride, S. J. May, V. B. Shenoy, E. A. Stach, Y. Gogotsi, *Cell Rep. Phys. Sci.* **2022**, 3, 101073.
- [3] Y. Zhou, M. Wu, J. Jiang, P. Yang, T. Rao, J. J. Liou, W. Liao, *Appl. Surf. Sci.* **2022**, 574, 151463.
- [4] H. Peng, M. He, Y. Zhou, Z. Song, Y. Wang, S. Feng, X. Chen, X. Zhang, H. Chen, *Chem. Eng. J.* **2022**, 433, 133269.
- [5] R. Li, Q. Gao, H. Xing, Y. Su, H. Zhang, D. Zeng, B. Fan, B. Zhao, *Carbon* **2021**, 183, 301.
- [6] W. Gu, R. Zhan, R. Li, J. Liu, J. Zhang, *Coatings* **2021**, 11, 982.
- [7] F. Ye, C. Song, Q. Zhou, X. Yin, M. Han, X. Li, L. Zhang, L. Cheng, *Materials* **2018**, 11, 1771.
- [8] H. Yang, J. Dai, X. Liu, Y. Lin, J. Wang, L. Wang, F. Wang, *Mater. Chem. Phys.* **2017**, 200, 179.
- [9] S. Zeghina, J.-L. Wojkiewicz, S. Lamouri, B. Belaabed, N. Redon, *J. Appl. Polym. Sci.* **2014**, 131, 40961.
- [10] L. Wang, X. Jia, Y. Li, F. Yang, L. Zhang, L. Liu, X. Ren, H. Yang, *J. Mater. Chem. A* **2014**, 2, 14940.
